# Supplementary material for: General and reproductive health outcomes among female greenhouse workers: a comparative study
Source: PubMed Central journal article supplement (PMC7222304; doi:10.1186/s12905-020-00966-y), 2020-05-13
Supplement: 12905_2020_966_MOESM1_ESM.pdf [file 12905_2020_966_MOESM1_ESM.pdf]

**“Health status and reproductive outcomes questionnaire”**

ID number: \_\_\_\_\_

Group: \_\_\_\_\_

**Section A: Demographic and Obstetrical information**

1. What is your age: \_\_\_\_\_
2. What is your educational status: \_\_\_\_\_
3. What is your husband's occupation? \_\_\_\_\_
4. How many children do you have? \_\_\_\_\_ Number of girls: \_\_\_\_\_ Number of boys: \_\_\_\_\_
5. How many previous pregnancies do you have? \_\_\_\_\_
6. How many spontaneous abortions do you have? \_\_\_\_\_
7. Do you have a history of stillbirths in previous pregnancies? Yes  No
8. Do you have a history of abnormal birth in previous pregnancies? Yes  No

If yes, please state the type of abnormality: \_\_\_\_\_

9. Do you have a history of preterm birth in previous pregnancies? Yes  No
10. Do you have a history of post term birth in previous pregnancies? Yes  No
11. Do you have a history of infant birth with low weight (<2500gr) in previous pregnancies?  
Yes  No

12. Do you have regular menstrual periods? Yes  No

13. Did you have a history of infertility? Yes  No

If yes, what kind of infertility do you have? Primary infertility  Secondary infertility

**Section B: Occupational Status (only for greenhouse workers)**

1. How long have you been working in the greenhouse? \_\_\_\_\_ years \_\_\_\_\_ months
2. How many hours a day do you work in the greenhouse? \_\_\_\_\_ hours
3. Have you been exposed to pesticides during previous pregnancies? Yes  No   
If yes, state the duration of exposure in pregnancy: \_\_\_\_\_ months

4. What is the average number of pesticide sprays per month? \_\_\_\_\_
5. What is the approximate distance of your place of residence from the greenhouse? \_\_\_\_\_  
(km)
6. Do you use personal protective equipment while working in the greenhouse? Yes  No

**Section C: Clinical measurements:**

1. Weight: \_\_\_\_\_(kg)
2. Height: \_\_\_\_\_ (cm)
3. Body mass index: \_\_\_\_\_ kg/m<sup>2</sup>
4. Systolic blood pressure: \_\_\_\_\_ (mmHg)
5. Diastolic blood pressure: \_\_\_\_\_(mmHg)
6. Number of breaths: \_\_\_\_\_
7. Number of pulse: \_\_\_\_\_
8. WBC: \_\_\_\_\_
9. RBC: \_\_\_\_\_
10. Hb: \_\_\_\_\_
11. HCT: \_\_\_\_\_
12. MCV: \_\_\_\_\_
13. MCHC: \_\_\_\_\_
14. PLT: \_\_\_\_\_
